# Supplementary material for: Nucleotide heterogeneity at the terminal ends of the genomes of two California Citrus tristeza virus strains and their complete genome sequence analysis
Source: Springer Nature journal article supplement (doi:10.1186/s12985-018-1041-4), 2018-09-15

Figure S1

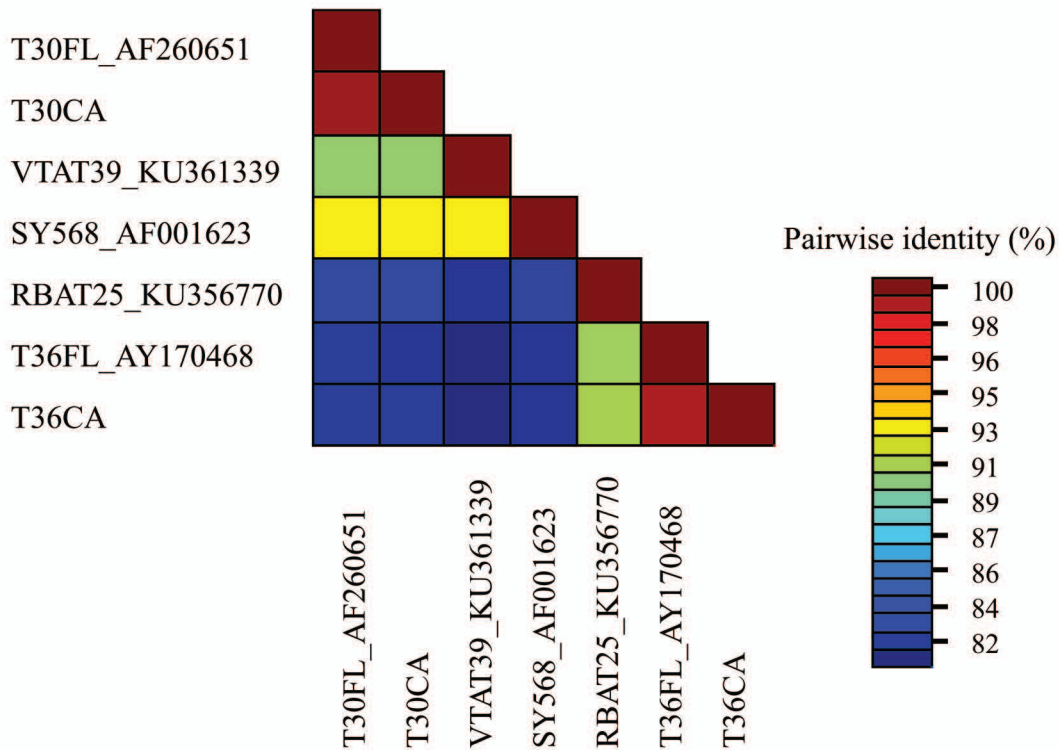

Supplement: MOESM2 [file 16127220]
